# Supplementary material for: Application of Ligilactobacillus salivarius SP36, a Strain Isolated from an Old Cheese Seal, as an Adjunct Culture in Cheesemaking
Source: MDPI journal article supplement (doi:10.3390/foods13142296), 2024-07-21

**Supplementary Table S1.** Physico-chemical and colour parameters (mean±SD) of the ewes' milk cheeses made in this study.

| Parameter                   | Days | Type of cheese |              |    |
|-----------------------------|------|----------------|--------------|----|
|                             |      | CS             | LS           |    |
| pH                          | 1    | 5.09±0.05d     | 5.38±0.02a   | *  |
|                             | 60   | 5.16±0.02c     | 5.23±0.01c   | *  |
|                             | 120  | 5.23±0.04b     | 5.25±0.05b   | ns |
|                             | 180  | 5.24±0.07b     | 5.34±0.03b   | ns |
|                             | 240  | 5.36±0.04a     | 5.35±0.05b   | ns |
| Fat (%)                     | 1    | 34.21±0.30d    | 34.30±1.23c  | ns |
|                             | 60   | 38.58±0.34c    | 37.72±0.77b  | ns |
|                             | 120  | 39.34±0.71b    | 40.06±0.60a  | ns |
|                             | 180  | 40.61±0.65b    | 41.08±1.82a  | ns |
|                             | 240  | 41.99±0.03a    | 41.73±0.82a  | ns |
| Protein (%)                 | 1    | 23.45±0.35a    | 23.56±0.51b  | ns |
|                             | 60   | 23.38±0.46a    | 23.02±0.05b  | ns |
|                             | 120  | 23.79±0.62a    | 24.02±0.53b  | ns |
|                             | 180  | 24.45±0.12a    | 24.18±0.50ab | ns |
|                             | 240  | 25.04±0.65a    | 25.77±0.30a  | ns |
| Moisture (%)                | 1    | 40.51±0.72a    | 40.14±1.46a  | ns |
|                             | 60   | 32.09±0.88b    | 33.15±0.79b  | ns |
|                             | 120  | 30.73±1.52c    | 29.50±1.31bc | ns |
|                             | 180  | 28.44±1.08c    | 28.18±0.52c  | ns |
|                             | 240  | 26.64±0.72d    | 26.39±0.87c  | ns |
| NaCl (g)                    | 1    | 0.73±0.02b     | 0.74±0.04c   | ns |
|                             | 60   | 1.37±0.05a     | 1.46±0.12b   | ns |
|                             | 120  | 1.32±0.03ab    | 1.39±0.02b   | ns |
|                             | 180  | 1.60±0.34a     | 1.58±0.45b   | ns |
|                             | 240  | 1.50±0.01a     | 1.89±0.11a   | ns |
| <i>Luminosity value (L)</i> | 1    | 89.78±0.94a    | 89.10±0.54a  | ns |
|                             | 60   | 82.58±0.31b    | 82.45±2.11b  | ns |
|                             | 120  | 81.73±0.93b    | 80.79±0.33b  | ns |
|                             | 180  | 79.84±0.66b    | 79.38±0.07b  | ns |
|                             | 240  | 75.75±1.30c    | 76.86±2.36b  | ns |
| a*                          | 1    | -0.42±0.16a    | -0.13±0.22a  | ns |
|                             | 60   | -0.76±0.24b    | -0.23±0.36a  | ns |
|                             | 120  | -1.05±0.17b    | -0.32±0.24a  | ns |
|                             | 180  | -1.22±0.14b    | -0.57±0.32a  | ns |
|                             | 240  | -1.59±0.19c    | -0.90±0.14a  | ns |
| b*                          | 1    | 12.19±1.24a    | 14.08±1.09a  | ns |
|                             | 60   | 12.99±0.22a    | 14.86±2.20a  | ns |
|                             | 120  | 14.70±1.46a    | 16.30±0.25a  | ns |
|                             | 180  | 14.27±1.99a    | 15.30±0.54a  | ns |
|                             | 240  | 14.89±2.65a    | 15.86±0.94a  | ns |

CS: cheese made with commercial starter; LS: cheese made with commercial starter and *L. salivarius*. a-c: Different letters in the same column indicate significant statistical differences for days of ripening ( $p < 0.05$ ).\*: Significant differences between CS and LS cheeses ( $p < 0.05$ ). ns: No significant differences between CS and LS cheeses ( $p < 0.05$ ).

**Supplementary Table S2.** Texture parameters (mean±SD) of the ewes' milk cheeses made in this study.

| Parameter          | Days | Type of cheese |              |    |
|--------------------|------|----------------|--------------|----|
|                    |      | CS             | LS           |    |
| Hardness (N)       | 1    | 8,01±0.52a     | 8,66±1.91b   | ns |
|                    | 60   | 13,46±0.73a    | 14,61±0.14a  | ns |
|                    | 120  | 11,99±1.88a    | 10,28±0.85ab | ns |
|                    | 180  | 10,52±1.37a    | 10,45±1.77ab | ns |
|                    | 240  | 15,06±4.72a    | 11,88±0.37ab | ns |
| Adhesiveness (N*s) | 1    | -0,06±0.03a    | -0,06±0.05a  | ns |
|                    | 60   | -0,09±0.08a    | -0,09±0.09a  | ns |
|                    | 120  | -0,05±0.02a    | -0,03±0.02a  | ns |
|                    | 180  | -0,05±0.02a    | -0,01±0.00a  | ns |
|                    | 240  | -0,01±0.01a    | -0,02±0.02a  | ns |
| Cohesiveness       | 1    | 0,78±0.00a     | 0,78±0.00a   | ns |
|                    | 60   | 0,57±0.02b     | 0,38±0.04b   | ns |
|                    | 120  | 0,40±0.02c     | 0,37±0.06b   | ns |
|                    | 180  | 0,28±0.01d     | 0,26±0.05b   | ns |
|                    | 240  | 0,23±0.00d     | 0,25±0.03b   | ns |
| Gumminess          | 1    | 6,26±0.40b     | 6,74±1.48a   | ns |
|                    | 60   | 7,65±0.70a     | 5,60±0.48ab  | ns |
|                    | 120  | 4,75±0.44bc    | 3,85±0.89ab  | ns |
|                    | 180  | 2,90±0.24c     | 2,68±0.12b   | ns |
|                    | 240  | 3,47±1.11c     | 2,96±0.55b   | ns |
| Chewiness (N)      | 1    | 6,26±0.40bc    | 6,74±1.48a   | ns |
|                    | 60   | 7,65±0.70a     | 5,94±0.83a   | ns |
|                    | 120  | 4,92±0.44bc    | 4,15±1.00a   | ns |
|                    | 180  | 3,62±0.25c     | 3,61±1.04a   | ns |
|                    | 240  | 5,43±1.11bc    | 4,02±0.20a   | ns |
| Springiness        | 1    | 1,00±0.00c     | 1,00±0.00a   | ns |
|                    | 60   | 1,00±0.00c     | 1,06±0.06a   | ns |
|                    | 120  | 1,03±0.05bc    | 1,10±0.01a   | ns |
|                    | 180  | 1,24±0.11bc    | 1,36±0.44a   | ns |
|                    | 240  | 1,60±0.04a     | 1,38±0.20a   | ns |
| Resilience         | 1    | 0,49±0.01b     | 0,47±0.01a   | ns |
|                    | 60   | 0,23±0.00b     | 0,27±0.09a   | ns |
|                    | 120  | 0,21±0.07b     | 0,32±0.01a   | ns |
|                    | 180  | 0,50±0.19b     | 0,69±0.71a   | ns |
|                    | 240  | 1,00±0.02a     | 0,73±0.27a   | ns |

CS: cheese made with commercial starter; LS: cheese made with commercial starter and *L. salivarius*. a-b: Different letters in the same column indicate significant statistical differences for days of ripening ( $p < 0.05$ ). \*: Significant differences between CS and LS cheeses ( $p < 0.05$ ). ns: No significant differences between CS and LS cheeses ( $p < 0.05$ ).

**Figure S1.** External and internal sensory descriptors of both cheese types (CS and LS) at days 60, 120, 180 and 240 of ripening.

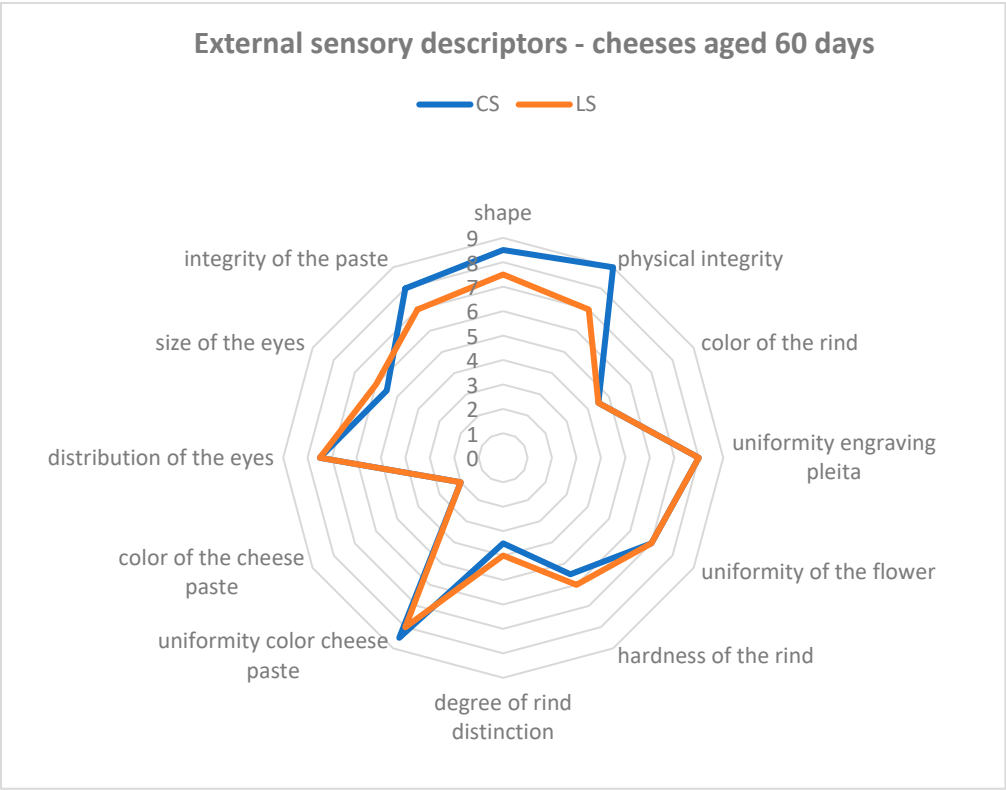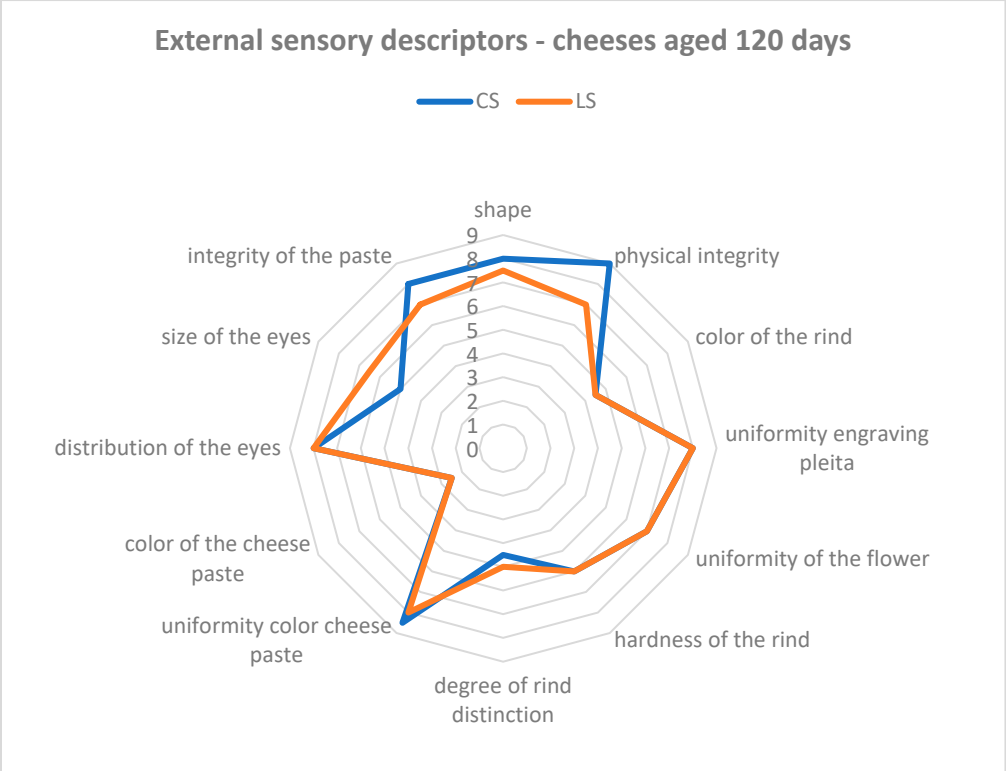

### External sensory descriptors - cheeses aged 180 days

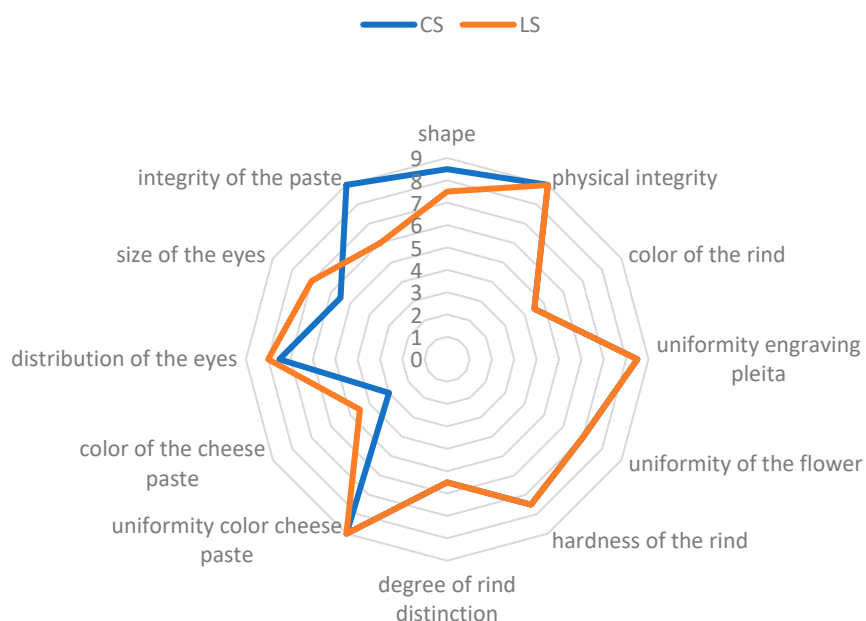

### External sensory descriptors - cheeses aged 240 days

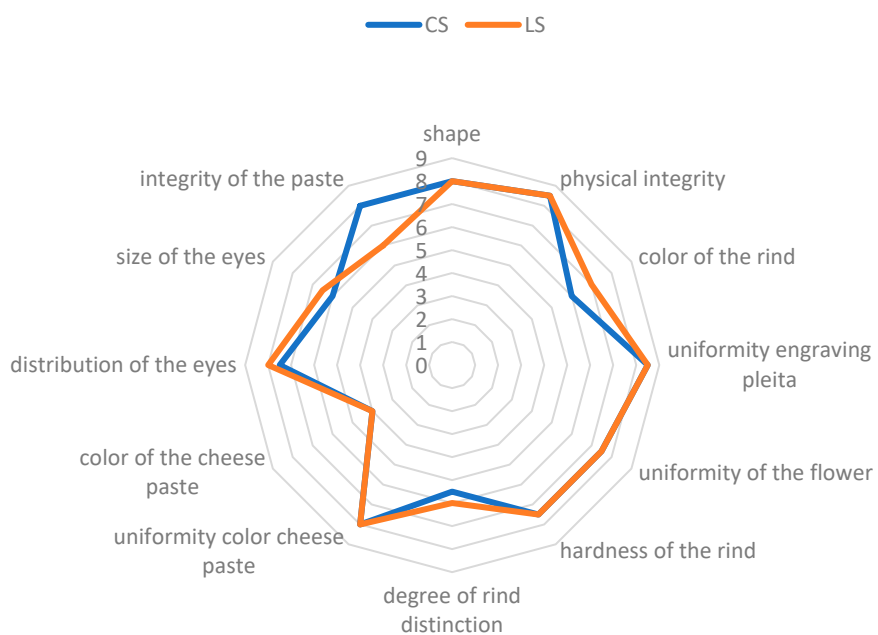

### Internal sensory descriptors - cheeses aged 60 days

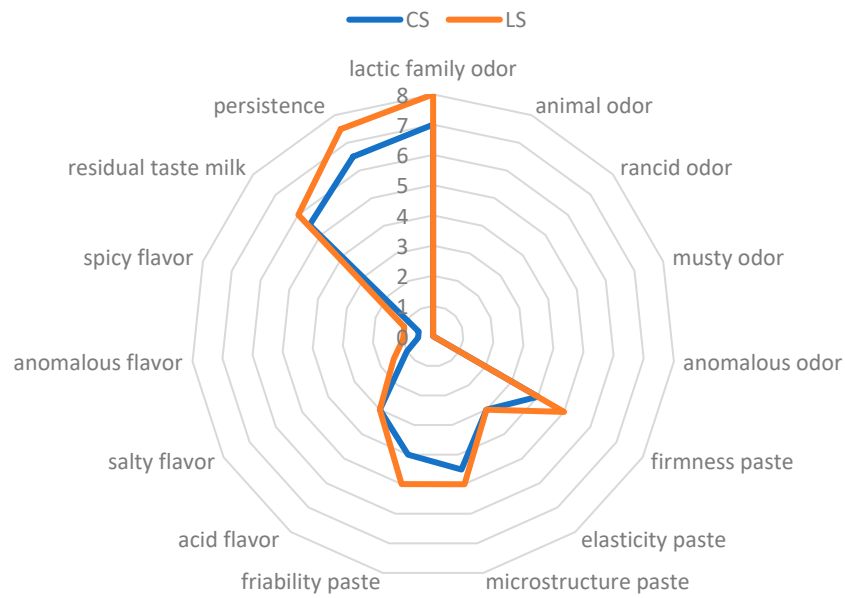

### Internal sensory descriptors - cheeses aged 120 days

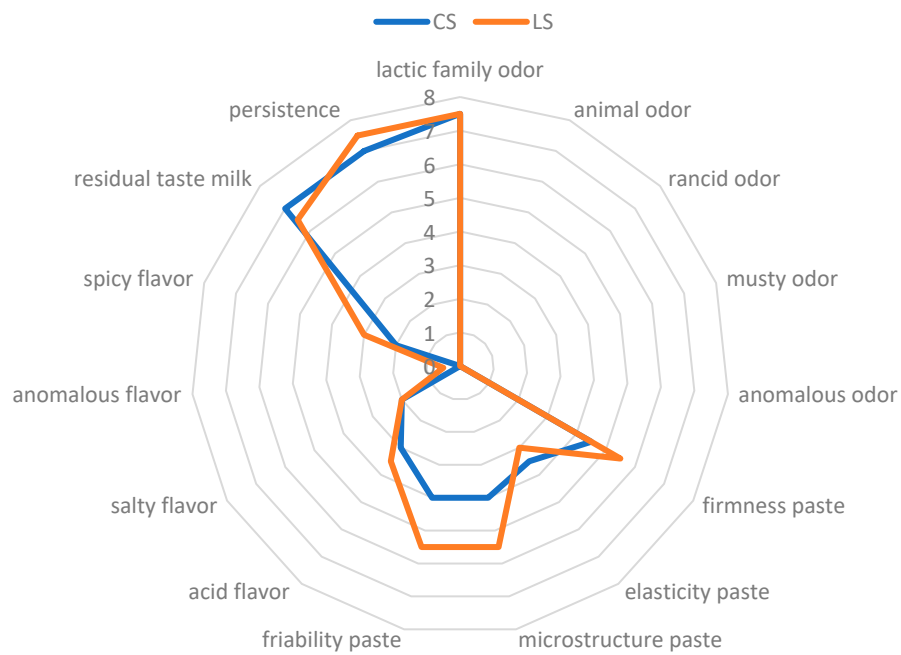

### Internal sensory descriptors - cheeses aged 180 days

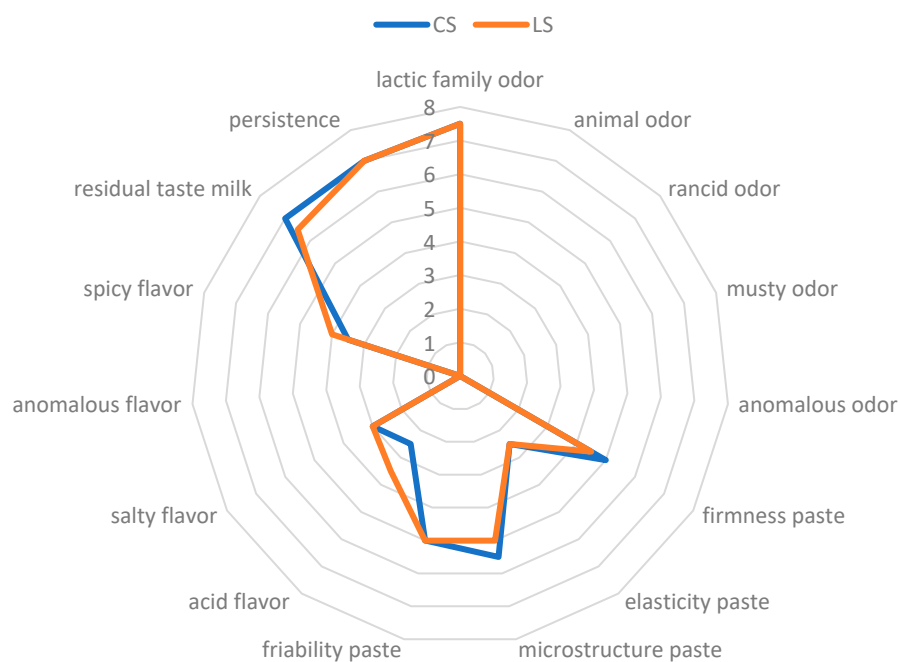

### Internal sensory descriptors - cheeses aged 240 days

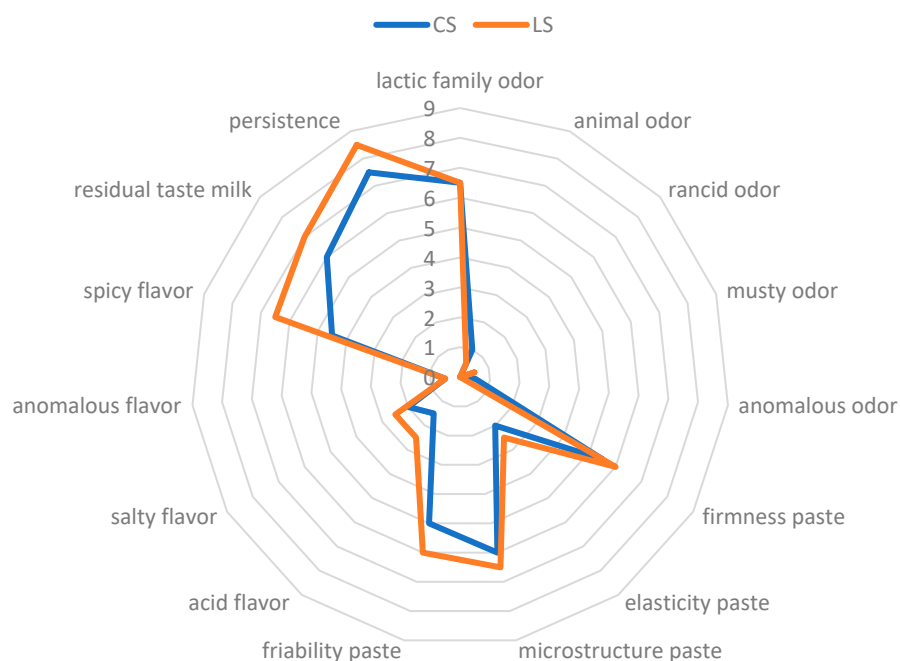

Supplement: s1 [file s1]
